# Supplementary material
Source: MDPI journal article supplement (https://www.mdpi.com/2227-9040/9/5/92)
Supplement: s1 [file s1]

Supporting Information  
For  
**Development of a Tri-Functional Nanoprobe for Background-Free SERS Detection of  
Sialic Acid on the Cell Surface**

Septila Renata,<sup>1,2,3</sup> Nitish Verma,<sup>1,2,4</sup> Zhijay Tu,<sup>1</sup> Rong-Long Pan,<sup>2,3</sup> Mario Hofmann,<sup>5</sup> and Chun-Hung Lin<sup>1,2,6,\*</sup>

<sup>1</sup>Institute of Biological Chemistry, Academia Sinica, No. 128, Academia Road, Section 2, Nankang, Taipei 11529, Taiwan

<sup>2</sup>Chemical Biology and Molecular Biophysics, Taiwan International Graduate Program, Institute of Biological Chemistry, Academia Sinica, No. 128, Academia Road, Section 2, Nankang, Taipei 11529, Taiwan

<sup>3</sup>Institute of Bioinformatics and Structural Biology, College of Life Science, National Tsing Hua University, No. 101, Section 2, Kuang-Fu Road, Hsinchu 300044, Taiwan

<sup>4</sup>Department of Chemistry, National Tsing Hua University, No. 101, Section 2, Kuang-Fu Road, Hsinchu 300044, Taiwan

<sup>5</sup>Department of Physics, National Taiwan University, No. 1, Section 4, Roosevelt Road, Taipei 10617, Taiwan

<sup>6</sup>Department of Chemistry and Institute of Biochemical Sciences, National Taiwan University, No. 1, Section 4, Roosevelt Road, Taipei 10617, Taiwan

## Table of Contents

|                                                                                              |     |
|----------------------------------------------------------------------------------------------|-----|
| <b>1. Sensitivity of AgNCs towards reporter 6</b> .....                                      | S1  |
| <b>Table S1.</b> Listed spatial resolution of SERS based sialic acid detection methods ..... | S1  |
| <b>References</b> .....                                                                      | S2  |
| <b>2. NMR Spectra</b> .....                                                                  | S3  |
| <sup>1</sup> H NMR spectrum of compound <b>1</b> (500 MHz, MeOD) .....                       | S3  |
| <sup>13</sup> C NMR spectrum of compound <b>1</b> (125 MHz, MeOD) .....                      | S3  |
| <sup>1</sup> H NMR spectrum of compound <b>2</b> (500 MHz, MeOD) .....                       | S4  |
| <sup>13</sup> C NMR spectrum of compound <b>2</b> (125 MHz, MeOD) .....                      | S4  |
| <sup>1</sup> H NMR spectrum of compound <b>3</b> (500 MHz, MeOD) .....                       | S5  |
| <sup>13</sup> C NMR spectrum of compound <b>3</b> (125 MHz, MeOD) .....                      | S5  |
| <sup>1</sup> H NMR spectrum of compound <b>4</b> (500 MHz, MeOD) .....                       | S6  |
| <sup>13</sup> C NMR spectrum of compound <b>4</b> (125 MHz, MeOD) .....                      | S6  |
| <sup>1</sup> H NMR spectrum of compound <b>5</b> (500 MHz, MeOD) .....                       | S7  |
| <sup>13</sup> C NMR spectrum of compound <b>5</b> (125 MHz, MeOD) .....                      | S7  |
| <sup>1</sup> H NMR spectrum of compound <b>6</b> (500 MHz, MeOD) .....                       | S8  |
| <sup>13</sup> C NMR spectrum of compound <b>6</b> (125 MHz, MeOD) .....                      | S8  |
| <sup>1</sup> H- <sup>13</sup> C 2D HMQC NMR spectrum of <b>6</b> (500/125 MHz, MeOD) .....   | S9  |
| <sup>1</sup> H- <sup>13</sup> C 2D HMBC NMR spectrum of <b>6</b> (500/125 MHz, MeOD) .....   | S9  |
| <sup>1</sup> H- <sup>1</sup> H 2D COSY NMR spectrum of <b>6</b> (500/125 MHz, MeOD) .....    | S10 |
| High Resolution Mass Spectra of compound <b>6</b> .....                                      | S10 |

## 1. Sensitivity of AgNCs towards reporter 6

AgNCs (1  $\mu\text{L}$ ) were reacted with 10  $\mu\text{L}$  of solution of reporter **6** in EtOH with different concentration (100  $\mu\text{M}$ , 10  $\mu\text{M}$ , 1  $\mu\text{M}$ , 100 nM, and 10 nM). Then, the solution was dropped on defined area of silicon wafer, and dried under ambient atmosphere before Raman measurements. The line in Figure S1 was generated between SERS intensity vs. moles of reporter **6**.

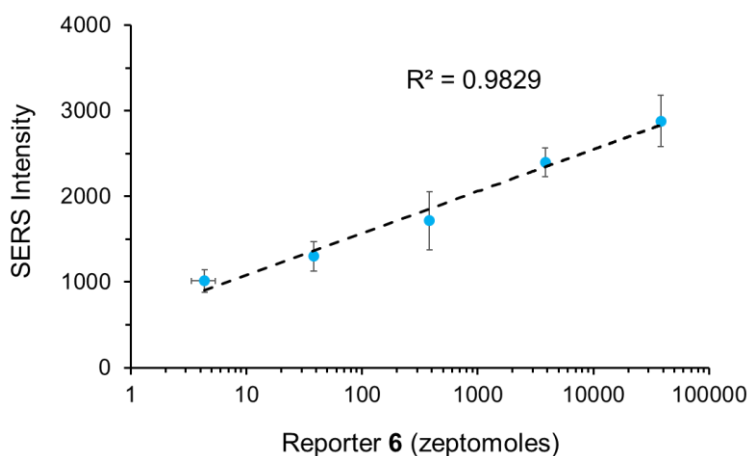

**Figure S1.** Sensitivity of AgNCs towards reporter **6**.

**Table S1.** Listed spatial resolution of SERS based sialic acid detection methods

| Reference | Spatial resolution <sup>a</sup> | Type of cell image performed |
|-----------|---------------------------------|------------------------------|
| This work | 382 nm                          | SERS mapping image           |
| Ref. [1]  | 309 nm                          | Dark field image             |
| Ref. [2]  | 858 nm                          | Dark field image             |
| Ref. [3]  | -                               | SERS mapping image           |

<sup>a</sup>Spatial resolution was calculated by formula:  $(0.61 \times \lambda)/\text{N.A.}$ ;  
N.A. = Numerical aperture.

## References

1. Gong, T.; Cui, Y.; Goh, D.; Voon, K.K.; Shum, P.P.; Humbert, G.; Auguste, J.-L.; Dinh, X.-Q.; Yong, K.-T.; Olivo, M. Highly sensitive SERS detection and quantification of sialic acid on single cell using photonic-crystal fiber with gold nanoparticles. *Biosensors and Bioelectronics* **2015**, *64*, 227-233.
2. Deng, R.; Yue, J.; Qu, H.; Liang, L.; Sun, D.; Zhang, J.; Liang, C.; Xu, W.; Xu, S. Glucose-bridged silver nanoparticle assemblies for highly sensitive molecular recognition of sialic acid on cancer cells via surface-enhanced Raman scattering spectroscopy. *Talanta* **2018**, *179*, 200-206.
3. He, X.-N.; Wang, Y.-N.; Wang, Y.; Xu, Z.-R. Accurate quantitative detection of cell surface sialic acids with a background-free SERS probe. *Talanta* **2020**, *209*, 120579.

## 2. NMR Spectra

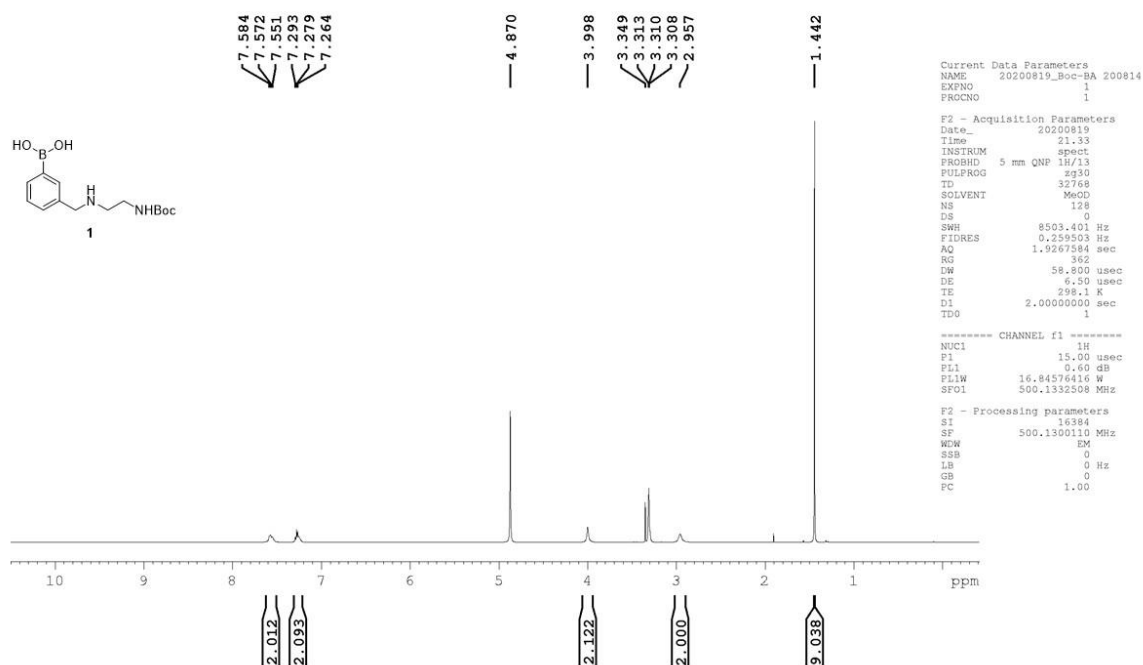

<sup>1</sup>H NMR spectrum of compound **1** (500 MHz, MeOD)

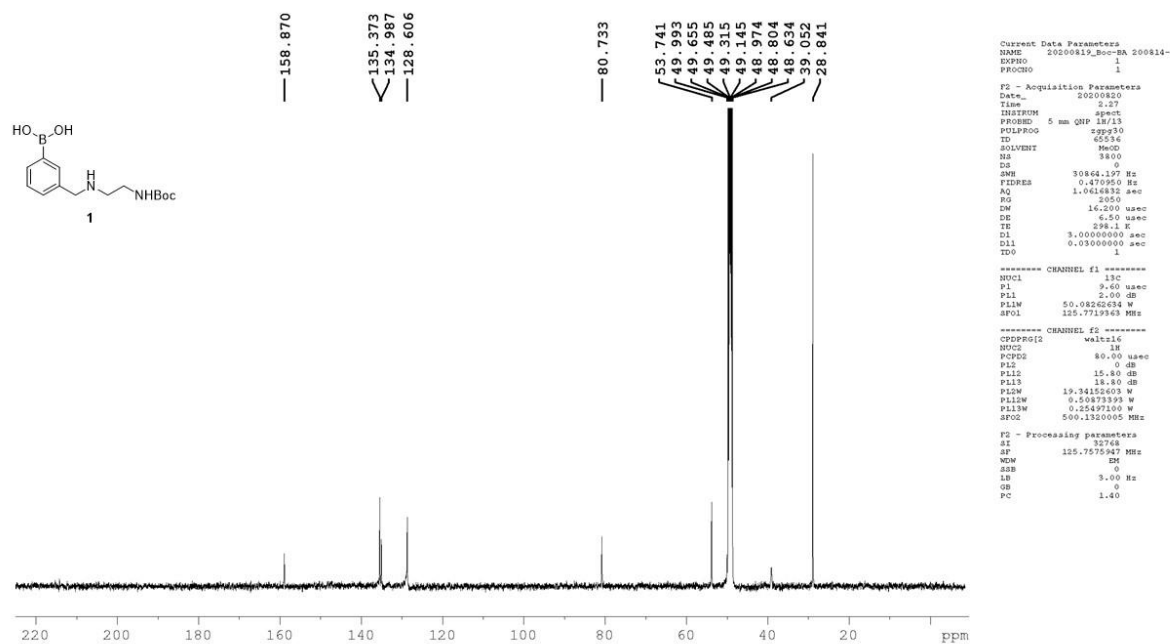

<sup>13</sup>C NMR spectrum of compound **1** (125 MHz, MeOD)

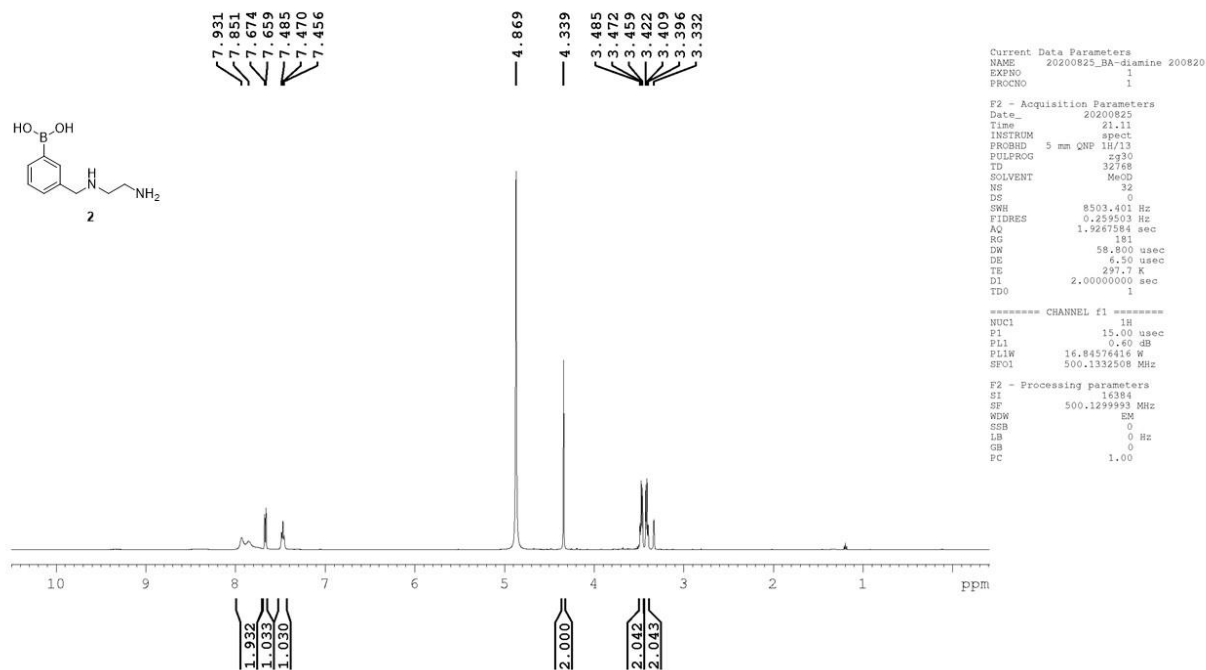

<sup>1</sup>H NMR spectrum of compound **2** (500 MHz, MeOD)

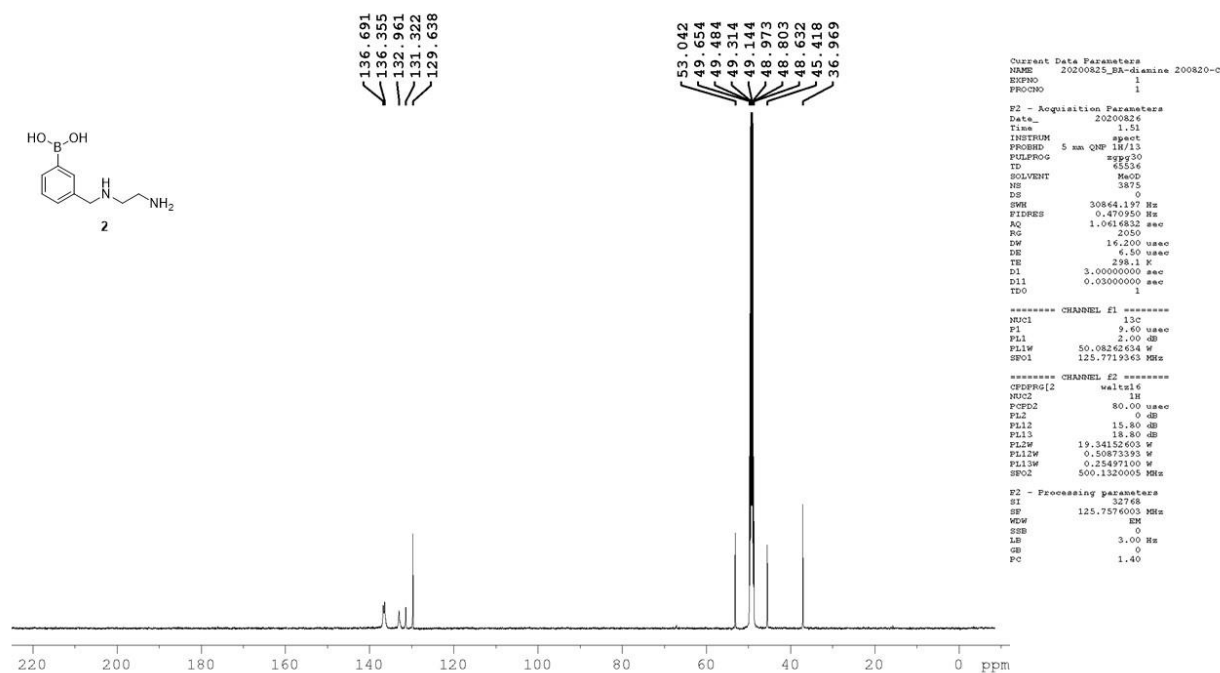

<sup>13</sup>C NMR spectrum of compound **2** (125 MHz, MeOD)



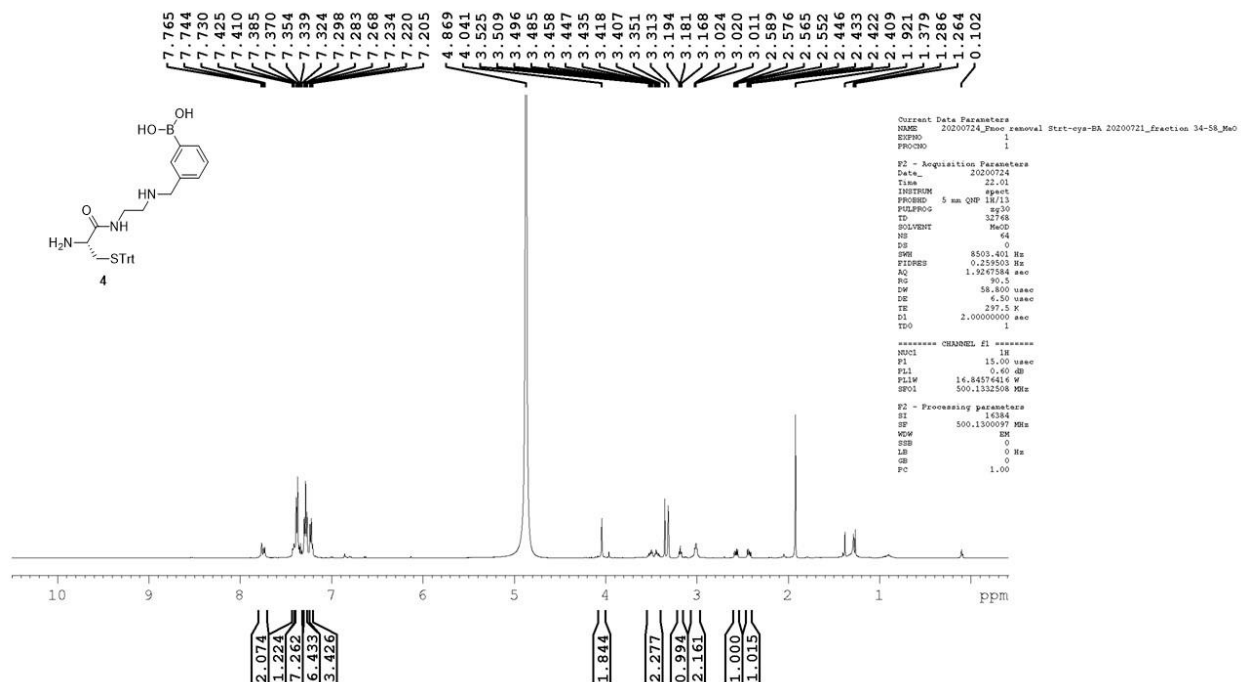

<sup>1</sup>H NMR spectrum of compound **4** (500 MHz, MeOD)

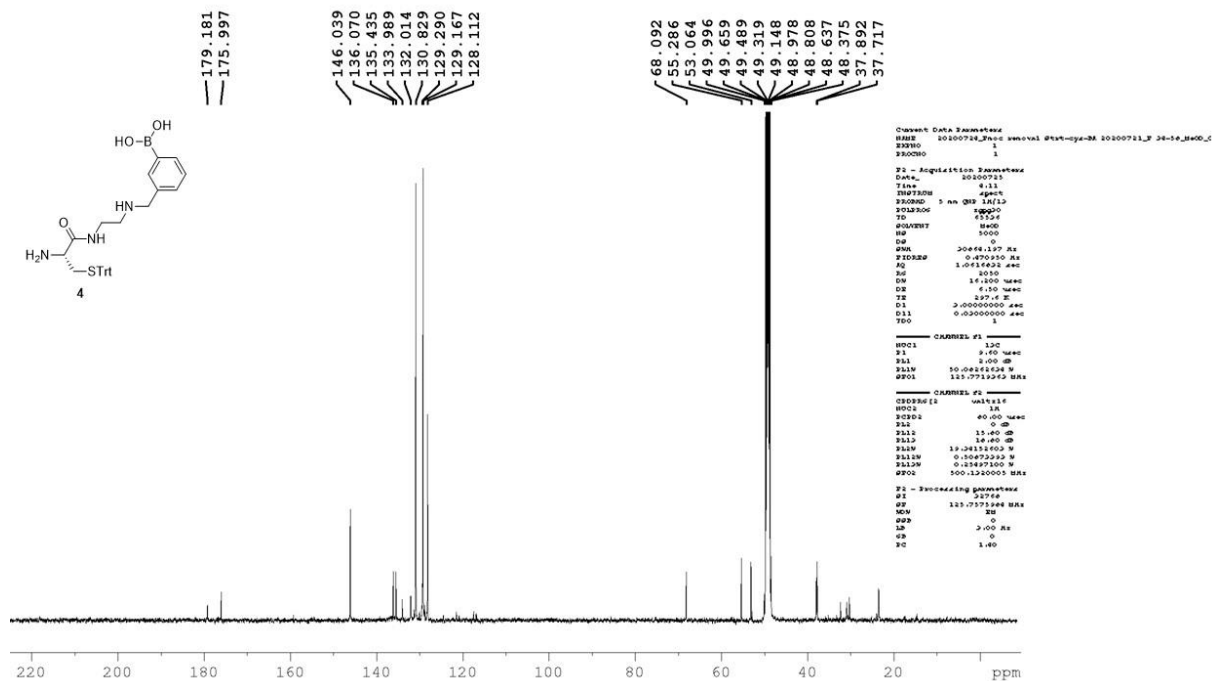

<sup>13</sup>C NMR spectrum of compound **4** (125 MHz, MeOD)



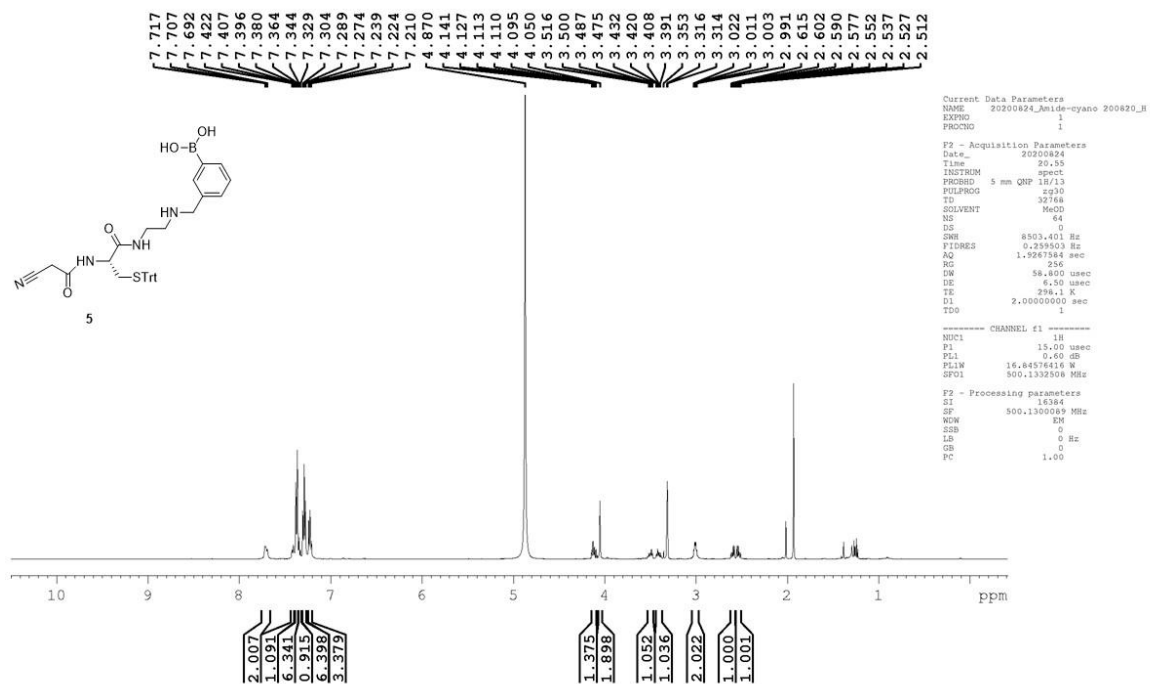

**<sup>1</sup>H NMR spectrum of compound 5 (500 MHz, MeOD)**

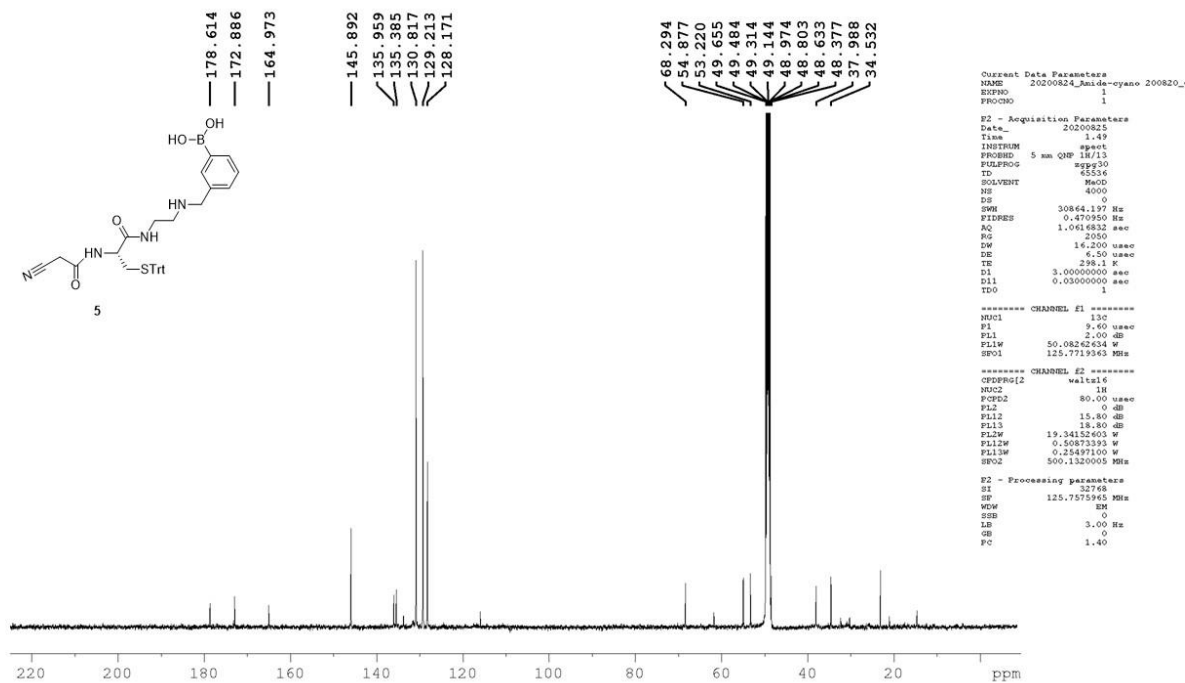

**<sup>13</sup>C NMR spectrum of compound 5 (125 MHz, MeOD)**

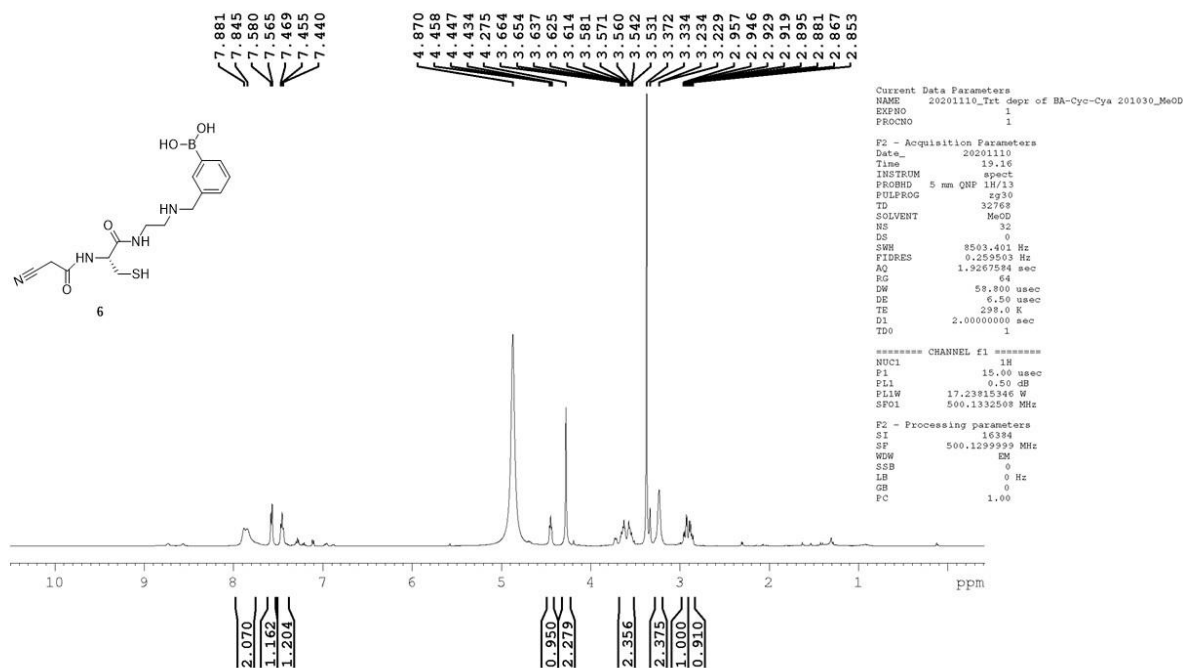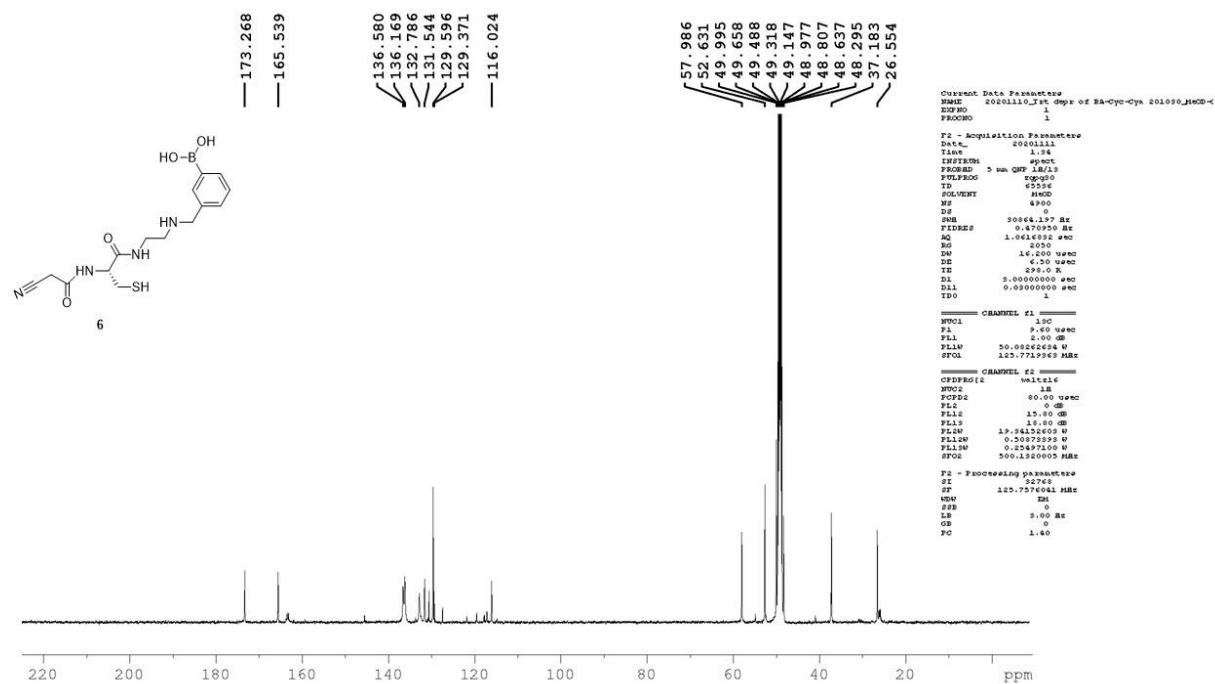

**$^1\text{H}$ - $^{13}\text{C}$  HMQC correlations of **6****

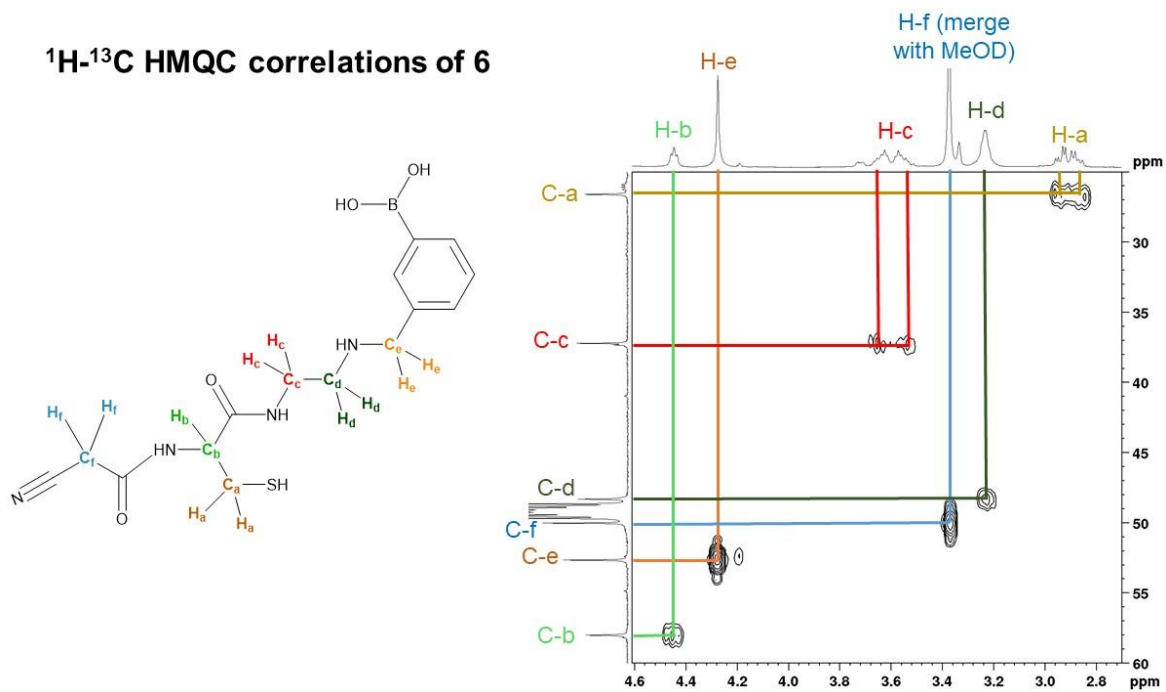

$^1\text{H}$ - $^{13}\text{C}$  2D HMQC NMR spectrum of **6** (500/125 MHz, MeOD)

**$^1\text{H}$ - $^{13}\text{C}$  HMBC correlations of **6****

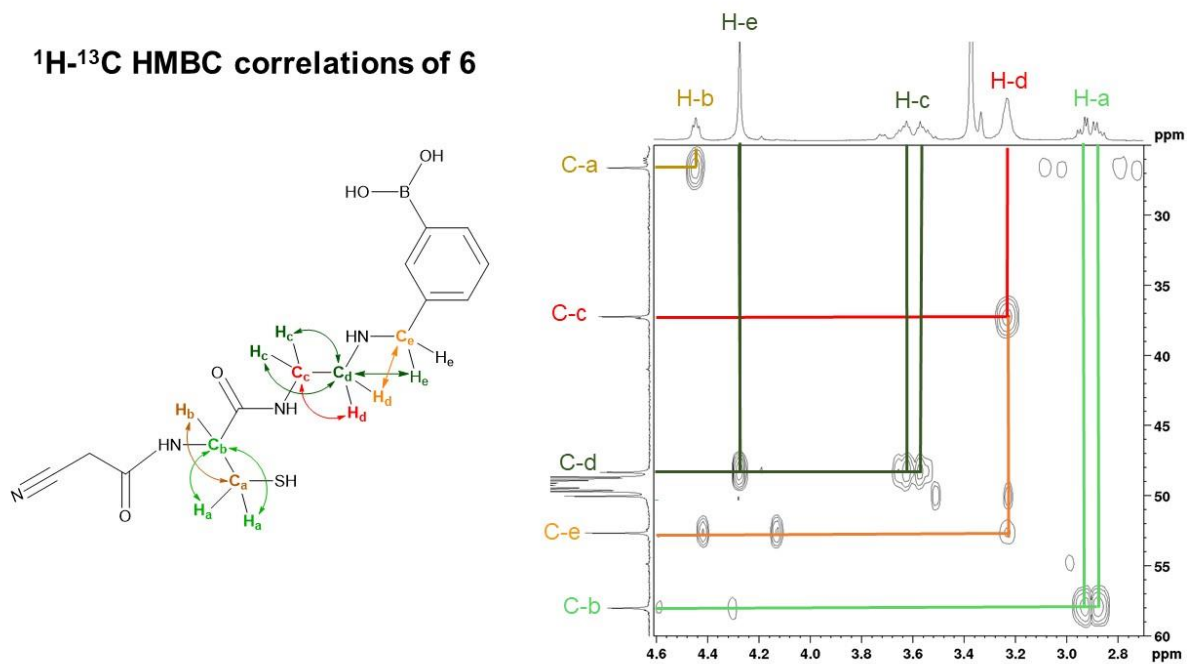

$^1\text{H}$ - $^{13}\text{C}$  2D HMBC NMR spectrum of **6** (500/125 MHz, MeOD)

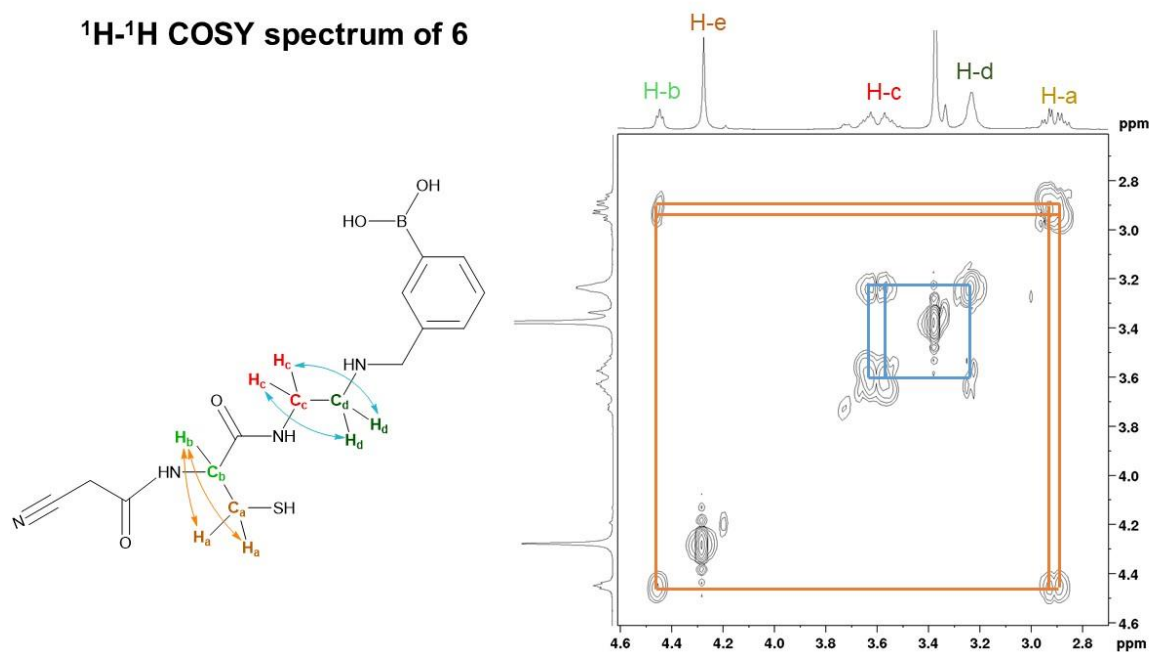

$^1\text{H}$ - $^1\text{H}$  2D COSY NMR spectrum of **6** (500/125 MHz, MeOD)

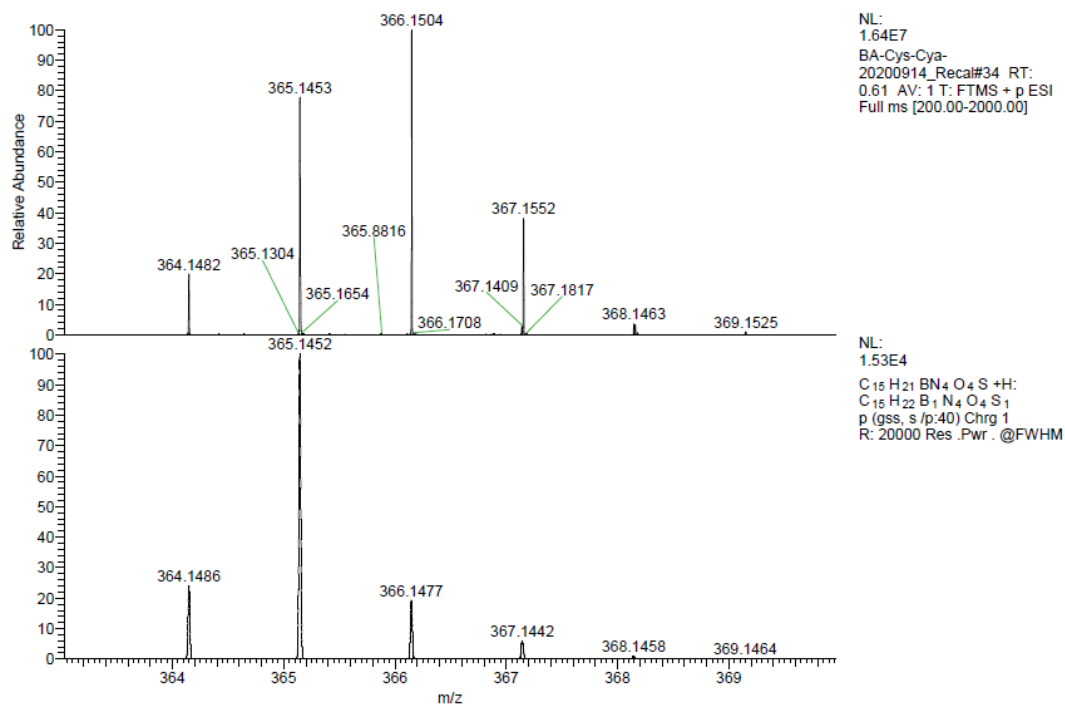

High Resolution Mass Spectra of compound **6**
